# Supplementary material for: Identification of mRNAs related to endometrium function regulated by lncRNA CD36–005 in rat endometrial stromal cells
Source: Reprod Biol Endocrinol. 2018 Oct 15;16:96. doi: 10.1186/s12958-018-0412-4 (PMC6190555; doi:10.1186/s12958-018-0412-4)
Supplement: Supplementary file 2 — Table S2. The raw data for Figure 4. (XLSX 9 kb) [file 12958_2018_412_MOESM2_ESM.xlsx]

## Sheet: Sheet1
	Relative OD value
Ad-GFP	1.07613	1.10025	0.911501	1.03691	0.877856	0.987969	1.00938
Ad-CD36-005	1.15008	1.18985	1.33666	1.25102	1.22349	1.2969	1.36419
NC	1.05805	1.08744	0.963997	0.890522
si-CD36-005	0.831741	0.840558	0.770022	0.83468	0.884644	0.83468
